# Supplementary material for: Genotype-Dependent Effect of Silencing of TaCKX1 and TaCKX2 on Phytohormone Crosstalk and Yield-Related Traits in Wheat
Source: MDPI journal article supplement (doi:10.3390/ijms222111494), 2021-10-25
Supplement: s1 [file s1]

Table S1. The range and the mean of relative expression in T<sub>1</sub> and selected T<sub>2</sub> lines of silenced and non-silenced *TaCKX1* lines.

|                      | Silenced |      |      | Non-silenced |      |      |
|----------------------|----------|------|------|--------------|------|------|
|                      | Min.     | Mean | Max. | Min.         | Mean | Max. |
| Ostka T <sub>1</sub> | 0.52     | 0.70 | 0.79 | 0.80         | 0.98 | 1.57 |
| Ostka T <sub>2</sub> | 0.37     | 0.53 | 0.68 | 0.69         | 0.86 | 1.42 |

Table S2 A,B. The range and the mean of relative expression in T<sub>1</sub> and selected T<sub>2</sub> lines of silenced and non-silenced *TaCKX2.2.1* (A) and *TaCKX2.2.2* (B) lines.

| A                    | Silenced |      |      | Non-silenced |      |      |
|----------------------|----------|------|------|--------------|------|------|
| <i>TaCKX2.2.1</i>    | Min.     | Mean | Max. | Min.         | Mean | Max. |
| Ostka T <sub>1</sub> | 0.62     | 0.74 | 0.79 | 0.80         | 1.20 | 2.39 |
| Ostka T <sub>2</sub> | 0.56     | 0.67 | 0.75 | 0.85         | 1.23 | 1.90 |

| B                    | Silenced |      |      | Non-silenced |      |      |
|----------------------|----------|------|------|--------------|------|------|
| <i>TaCKX2.2.2</i>    | Min.     | Mean | Max. | Min.         | Mean | Max. |
| Ostka T <sub>1</sub> | 0.51     | 0.68 | 0.78 | 0.80         | 1.09 | 1.53 |
| Ostka T <sub>2</sub> | 0.42     | 0.69 | 0.79 | 0.81         | 1.13 | 2.35 |

Table S3 A,B. Correlations between yield-related traits, expression of *TaCKX* GFM s and *NAC*, and phytohormones in *TaCKX1* silenced lines (number of tested lines: N12)

| A                 | Spike number | Spike length | Grain number | Grain yield | TGW   | Root mass | CKX activity | <i>TaCKX 1</i> | <i>TaCKX 2.2.1</i> | <i>TaCKX 2.1</i> | <i>TaCKX 11</i> | <i>TaCKX 5</i> | <i>TaCKX 9</i> | <i>NAC</i>  | tZ    | tZR   | tZ9G        | tZ9GOG |
|-------------------|--------------|--------------|--------------|-------------|-------|-----------|--------------|----------------|--------------------|------------------|-----------------|----------------|----------------|-------------|-------|-------|-------------|--------|
| Plant height      | 0.19         | 0.28         | 0.29         | 0.31        | 0.01  | 0.43      | 0.51         | -0.01          | 0.42               | 0.00             | -0.37           | -0.31          | 0.33           | -0.06       | -0.35 | -0.14 | 0.21        | -0.04  |
| Spike number      |              | -0.43        | <b>0.74</b>  | <b>0.74</b> | -0.11 | -0.17     | -0.10        | 0.43           | -0.28              | 0.03             | 0.32            | 0.06           | 0.25           | 0.37        | -0.24 | 0.24  | 0.55        | -0.18  |
| Spike length      |              |              | 0.12         | 0.09        | -0.07 | 0.01      | -0.18        | -0.01          | 0.03               | -0.04            | <b>-0.67</b>    | -0.21          | -0.36          | -0.55       | 0.38  | -0.42 | 0.02        | -0.04  |
| Grain number      |              |              |              | <b>0.97</b> | -0.23 | -0.36     | -0.12        | 0.40           | -0.28              | 0.11             | -0.12           | -0.04          | 0.15           | -0.09       | -0.22 | 0.20  | <b>0.69</b> | 0.01   |
| Grain yield       |              |              |              |             | 0.00  | -0.36     | -0.04        | 0.38           | -0.21              | -0.04            | -0.03           | -0.18          | 0.21           | -0.09       | -0.06 | 0.22  | <b>0.73</b> | 0.01   |
| TGW               |              |              |              |             |       | 0.03      | 0.29         | -0.11          | 0.26               | <b>-0.60</b>     | 0.35            | -0.37          | 0.11           | -0.07       | 0.07  | 0.11  | 0.15        | 0.08   |
| Root mass         |              |              |              |             |       |           | 0.07         | 0.14           | 0.27               | 0.34             | -0.24           | -0.05          | 0.06           | -0.16       | -0.22 | -0.20 | -0.01       | -0.37  |
| CKX activity      |              |              |              |             |       |           |              | -0.33          | 0.34               | -0.16            | 0.04            | -0.51          | 0.32           | 0.04        | -0.27 | -0.13 | -0.06       | 0.40   |
| <i>TaCKX1</i>     |              |              |              |             |       |           |              |                | -0.08              | -0.02            | 0.21            | 0.23           | 0.29           | -0.03       | -0.06 | 0.41  | 0.29        | -0.36  |
| <i>TaCKX2.2.1</i> |              |              |              |             |       |           |              |                |                    | -0.53            | -0.11           | 0.20           | <b>0.69</b>    | -0.22       | 0.01  | 0.10  | -0.02       | 0.38   |
| <i>TaCKX2.1</i>   |              |              |              |             |       |           |              |                |                    |                  | -0.21           | -0.33          | -0.46          | 0.00        | -0.22 | -0.27 | 0.00        | -0.22  |
| <i>TaCKX11</i>    |              |              |              |             |       |           |              |                |                    |                  |                 | 0.01           | 0.15           | <b>0.70</b> | -0.13 | 0.37  | -0.19       | 0.01   |
| <i>TaCKX5</i>     |              |              |              |             |       |           |              |                |                    |                  |                 |                | 0.46           | 0.33        | -0.07 | 0.47  | -0.27       | -0.20  |
| <i>TaCKX9</i>     |              |              |              |             |       |           |              |                |                    |                  |                 |                |                | 0.07        | -0.54 | 0.34  | 0.14        | 0.20   |
| <i>NAC</i>        |              |              |              |             |       |           |              |                |                    |                  |                 |                |                |             | -0.53 | 0.36  | -0.52       | -0.33  |
| tZ                |              |              |              |             |       |           |              |                |                    |                  |                 |                |                |             |       | -0.03 | 0.24        | 0.16   |
| tZR               |              |              |              |             |       |           |              |                |                    |                  |                 |                |                |             |       |       | -0.01       | -0.20  |
| tZ9G              |              |              |              |             |       |           |              |                |                    |                  |                 |                |                |             |       |       |             | 0.26   |

Gray – non-parametric analysis

| B                 | tZ7G  | tZOG         | tZOGR        | cZ          | cZ9G        | DZR          | DZOG         | DZOGR        | iP           | iP7G         | o,m,pTs      | BA           | IAA          | PAA          | ABA          | SPAD first spike | SPAD next spikes |
|-------------------|-------|--------------|--------------|-------------|-------------|--------------|--------------|--------------|--------------|--------------|--------------|--------------|--------------|--------------|--------------|------------------|------------------|
| Plant height      | 0.33  | -0.26        | -0.09        | -0.43       | 0.12        | -0.21        | -0.10        | 0.25         | -0.41        | 0.07         | 0.17         | -0.27        | 0.14         | <b>0.70</b>  | 0.08         | -0.25            | -0.18            |
| Spike number      | -0.16 | -0.17        | -0.46        | -0.05       | -0.22       | -0.40        | -0.35        | 0.27         | 0.23         | -0.41        | <b>0.64</b>  | 0.22         | -0.35        | -0.19        | 0.14         | -0.16            | -0.41            |
| Spike lenght      | -0.15 | -0.04        | 0.30         | 0.07        | 0.13        | 0.23         | 0.13         | -0.03        | 0.19         | 0.21         | -0.19        | 0.17         | 0.02         | 0.31         | -0.14        | -0.38            | -0.23            |
| Grain number      | 0.02  | -0.27        | -0.09        | 0.01        | 0.17        | -0.14        | -0.07        | -0.04        | 0.56         | -0.34        | 0.04         | 0.54         | -0.36        | -0.18        | 0.16         | -0.53            | -0.48            |
| Grain yield       | 0.02  | -0.31        | -0.13        | 0.01        | 0.05        | -0.25        | 0.05         | -0.08        | 0.49         | -0.29        | 0.16         | 0.48         | -0.21        | -0.18        | 0.35         | -0.38            | -0.33            |
| TGW               | -0.05 | 0.20         | 0.06         | 0.10        | 0.03        | -0.46        | 0.53         | -0.13        | -0.36        | 0.21         | 0.19         | -0.49        | 0.22         | -0.04        | 0.08         | <b>0.67</b>      | <b>0.60</b>      |
| Root mass         | 0.34  | -0.23        | -0.12        | -0.21       | -0.32       | -0.48        | 0.02         | 0.02         | <b>-0.70</b> | -0.04        | 0.18         | -0.22        | 0.52         | 0.27         | 0.15         | 0.31             | 0.11             |
| CKX activity      | 0.35  | -0.15        | 0.09         | -0.24       | 0.05        | -0.04        | 0.16         | 0.05         | -0.52        | 0.31         | -0.12        | <b>-0.62</b> | 0.42         | <b>0.74</b>  | 0.02         | 0.09             | 0.26             |
| <i>TaCKX1</i>     | -0.53 | 0.29         | <b>-0.76</b> | 0.38        | 0.26        | <b>-0.68</b> | -0.17        | -0.38        | 0.29         | 0.12         | 0.46         | 0.37         | -0.16        | -0.35        | -0.10        | 0.01             | -0.17            |
| <i>TaCKX2.2.1</i> | 0.38  | -0.15        | 0.08         | -0.08       | -0.27       | -0.14        | 0.34         | -0.28        | -0.41        | <b>0.62</b>  | 0.10         | -0.53        | 0.54         | 0.28         | 0.44         | -0.09            | 0.18             |
| <i>TaCKX2.1</i>   | 0.30  | -0.25        | -0.15        | -0.06       | 0.11        | 0.18         | -0.18        | 0.04         | 0.10         | <b>-0.70</b> | -0.25        | 0.27         | 0.14         | 0.00         | 0.02         | -0.11            | -0.24            |
| <i>TaCKX11</i>    | -0.37 | <b>0.61</b>  | -0.19        | 0.31        | 0.45        | -0.35        | -0.13        | -0.03        | 0.06         | -0.14        | 0.11         | -0.13        | -0.49        | -0.25        | -0.38        | <b>0.58</b>      | 0.32             |
| <i>TaCKX5</i>     | -0.14 | 0.12         | 0.15         | -0.14       | -0.19       | -0.01        | -0.33        | -0.04        | 0.21         | 0.34         | 0.15         | -0.11        | -0.16        | -0.08        | -0.01        | -0.15            | -0.25            |
| <i>TaCKX9</i>     | 0.30  | 0.00         | -0.11        | -0.29       | 0.08        | -0.37        | 0.11         | -0.39        | -0.21        | 0.46         | 0.03         | -0.38        | 0.21         | 0.01         | 0.09         | -0.07            | 0.25             |
| NAC               | -0.31 | 0.36         | -0.05        | -0.30       | 0.35        | 0.03         | <b>-0.71</b> | 0.49         | -0.01        | -0.25        | 0.09         | -0.22        | <b>-0.60</b> | 0.33         | -0.52        | 0.34             | 0.15             |
| tZ                | -0.52 | 0.16         | 0.23         | <b>0.70</b> | -0.22       | -0.03        | 0.47         | 0.16         | 0.34         | 0.18         | 0.14         | 0.16         | -0.16        | -0.47        | 0.15         | -0.07            | -0.20            |
| tZR               | -0.19 | 0.12         | -0.26        | 0.15        | 0.05        | -0.23        | -0.09        | -0.15        | 0.32         | 0.43         | 0.03         | -0.21        | -0.02        | -0.14        | 0.19         | -0.08            | -0.10            |
| tZ9G              | 0.22  | -0.48        | -0.33        | 0.26        | -0.50       | -0.44        | 0.48         | -0.20        | 0.14         | -0.26        | 0.42         | 0.35         | 0.25         | -0.48        | <b>0.72</b>  | -0.30            | -0.40            |
| tZ9GOG            | 0.38  | -0.21        | 0.11         | 0.34        | -0.05       | 0.23         | 0.57         | -0.29        | 0.00         | 0.19         | -0.45        | -0.10        | 0.26         | -0.29        | 0.42         | -0.36            | -0.13            |
| tZ7G              |       | <b>-0.88</b> | 0.20         | -0.43       | -0.55       | 0.30         | 0.50         | -0.27        | -0.38        | -0.24        | -0.32        | -0.19        | <b>0.73</b>  | 0.08         | <b>0.71</b>  | -0.16            | 0.22             |
| tZOG              |       |              | -0.27        | 0.40        | <b>0.64</b> | -0.36        | 0.01         | 0.00         | 0.12         | 0.40         | 0.26         | -0.18        | -0.55        | -0.09        | <b>-0.78</b> | 0.43             | 0.26             |
| tZOGR             |       |              |              | -0.27       | -0.21       | <b>0.82</b>  | -0.13        | 0.36         | 0.08         | -0.24        | -0.48        | -0.10        | -0.05        | 0.28         | 0.10         | -0.05            | 0.00             |
| cZ                |       |              |              |             | 0.35        | -0.17        | 0.30         | -0.32        | 0.44         | 0.06         | -0.18        | 0.30         | -0.32        | -0.49        | -0.10        | -0.04            | -0.33            |
| cZ9G              |       |              |              |             |             | -0.13        | -0.06        | -0.13        | 0.33         | 0.10         | -0.35        | 0.03         | -0.40        | 0.05         | <b>-0.60</b> | 0.08             | 0.24             |
| DZR               |       |              |              |             |             |              | -0.17        | 0.25         | 0.34         | -0.05        | <b>-0.70</b> | -0.19        | 0.11         | 0.26         | 0.01         | -0.46            | -0.17            |
| DZOG              |       |              |              |             |             |              |              | <b>-0.65</b> | -0.11        | 0.09         | -0.15        | 0.10         | 0.50         | -0.43        | 0.45         | 0.12             | 0.32             |
| DZOGR             |       |              |              |             |             |              |              |              | -0.23        | -0.25        | 0.11         | -0.37        | -0.54        | 0.51         | -0.30        | -0.05            | -0.38            |
| iP                |       |              |              |             |             |              |              |              |              | -0.22        | -0.04        | 0.58         | -0.56        | -0.35        | 0.01         | -0.44            | -0.35            |
| iP7G              |       |              |              |             |             |              |              |              |              |              | 0.16         | -0.34        | 0.12         | 0.15         | -0.14        | -0.07            | 0.20             |
| o,m,pTs           |       |              |              |             |             |              |              |              |              |              |              | -0.05        | -0.25        | -0.01        | -0.14        | 0.25             | -0.11            |
| BA                |       |              |              |             |             |              |              |              |              |              |              |              | -0.17        | <b>-0.61</b> | 0.12         | -0.10            | 0.05             |
| IAA               |       |              |              |             |             |              |              |              |              |              |              |              |              | 0.13         | <b>0.62</b>  | 0.01             | 0.30             |
| PAA               |       |              |              |             |             |              |              |              |              |              |              |              |              |              | -0.25        | -0.04            | 0.04             |
| ABA               |       |              |              |             |             |              |              |              |              |              |              |              |              |              |              | -0.33            | -0.18            |
| SPAD first spike  |       |              |              |             |             |              |              |              |              |              |              |              |              |              |              |                  | <b>0.77</b>      |

Gray – non-parametric analysis

Table S4 A,B. Correlations between yield-related traits, expression of *TaCKX* GFMs and *NAC*, and phytohormones in *TaCKX2* silenced lines (number of tested lines: N9).

[illegible]

| B                 | tZ9GOG | tZ7G         | tZOG  | tZOGR        | cZ           | cZ9G         | DZR   | DZOG        | DZOGR       | iP          | iP7G         | o,m,pTs | BA           | IAA          | PAA          | ABA          | SPAD first spike | SPAD next spikes |
|-------------------|--------|--------------|-------|--------------|--------------|--------------|-------|-------------|-------------|-------------|--------------|---------|--------------|--------------|--------------|--------------|------------------|------------------|
| Plant height      | 0.11   | 0.18         | 0.60  | -0.36        | -0.14        | -0.04        | 0.06  | 0.43        | -0.31       | -0.41       | <b>0.80</b>  | -0.12   | 0.40         | 0.50         | 0.27         | 0.40         | -0.39            | -0.22            |
| Spike number      | -0.29  | 0.15         | -0.01 | -0.25        | -0.54        | 0.18         | -0.15 | <b>0.76</b> | -0.46       | -0.66       | <b>0.75</b>  | -0.11   | -0.31        | 0.26         | -0.37        | -0.17        | -0.45            | -0.24            |
| Spike lenght      | 0.27   | -0.20        | 0.18  | -0.23        | 0.48         | -0.38        | -0.24 | -0.13       | 0.11        | 0.33        | 0.16         | 0.02    | <b>0.83</b>  | -0.10        | 0.53         | <b>0.72</b>  | -0.14            | -0.51            |
| Grain number      | -0.05  | -0.05        | 0.08  | <b>-0.67</b> | -0.01        | -0.36        | 0.20  | 0.02        | -0.59       | -0.28       | 0.41         | -0.05   | <b>0.74</b>  | 0.11         | 0.56         | 0.59         | -0.51            | -0.20            |
| Grain yield       | 0.15   | -0.02        | 0.37  | -0.52        | 0.03         | -0.25        | 0.05  | 0.21        | -0.12       | -0.24       | 0.52         | 0.00    | <b>0.73</b>  | 0.14         | 0.48         | 0.63         | -0.53            | -0.37            |
| TGW               | 0.56   | -0.20        | 0.32  | 0.26         | 0.03         | -0.12        | -0.37 | 0.56        | 0.43        | -0.03       | 0.19         | 0.15    | 0.18         | 0.11         | -0.15        | 0.19         | -0.23            | -0.54            |
| Root mass         | -0.25  | 0.65         | -0.18 | -0.35        | -0.06        | <b>-0.67</b> | -0.29 | -0.32       | 0.02        | 0.13        | -0.05        | 0.27    | -0.60        | 0.07         | -0.24        | -0.35        | 0.61             | 0.21             |
| CKX activity      | 0.27   | 0.33         | 0.28  | -0.52        | -0.21        | -0.25        | 0.36  | 0.22        | -0.33       | -0.16       | 0.08         | 0.57    | -0.29        | 0.02         | 0.09         | 0.00         | -0.42            | 0.29             |
| <i>TaCKX2.1</i>   | 0.07   | 0.60         | 0.07  | <b>-0.72</b> | 0.32         | <b>-0.81</b> | -0.17 | -0.37       | -0.02       | 0.32        | 0.04         | 0.02    | 0.30         | 0.41         | 0.40         | 0.45         | 0.20             | -0.08            |
| <i>TaCKX2.2.1</i> | -0.04  | -0.20        | -0.57 | 0.05         | 0.14         | -0.20        | -0.14 | -0.53       | 0.28        | 0.43        | <b>-0.79</b> | 0.47    | -0.46        | <b>-0.68</b> | -0.21        | -0.37        | 0.43             | 0.17             |
| <i>TaCKX2.2.2</i> | 0.27   | -0.43        | -0.27 | 0.38         | 0.39         | 0.17         | -0.61 | 0.03        | <b>0.72</b> | 0.40        | -0.25        | -0.08   | 0.31         | -0.41        | -0.05        | 0.31         | -0.03            | <b>-0.75</b>     |
| <i>TaCKX1</i>     | -0.35  | 0.10         | -0.27 | 0.43         | -0.40        | 0.33         | -0.21 | 0.46        | 0.15        | -0.28       | 0.25         | -0.04   | <b>-0.79</b> | -0.01        | <b>-0.73</b> | <b>-0.72</b> | 0.24             | 0.11             |
| <i>TaCKX11</i>    | -0.26  | 0.27         | 0.05  | 0.61         | -0.21        | 0.65         | -0.13 | 0.52        | 0.07        | -0.21       | 0.30         | -0.46   | -0.57        | 0.38         | -0.50        | -0.42        | 0.16             | 0.05             |
| <i>TaCKX5</i>     | -0.35  | -0.10        | -0.05 | 0.58         | -0.44        | 0.48         | -0.29 | 0.48        | 0.10        | -0.56       | 0.43         | -0.49   | -0.19        | 0.19         | -0.59        | -0.43        | 0.11             | -0.22            |
| <i>TaCKX9</i>     | -0.51  | 0.03         | -0.47 | 0.19         | -0.31        | -0.03        | -0.25 | 0.24        | 0.02        | -0.13       | 0.11         | 0.17    | <b>-0.75</b> | -0.23        | -0.66        | <b>-0.75</b> | 0.40             | 0.19             |
| <i>NAC</i>        | -0.08  | 0.02         | 0.20  | 0.38         | <b>-0.69</b> | 0.37         | -0.20 | 0.37        | -0.15       | -0.66       | 0.25         | -0.16   | -0.64        | 0.12         | <b>-0.78</b> | -0.65        | 0.02             | -0.11            |
| tZ                | -0.07  | 0.08         | -0.37 | -0.05        | <b>0.93</b>  | -0.42        | -0.26 | 0.02        | 0.60        | <b>0.89</b> | -0.11        | 0.17    | 0.27         | -0.05        | 0.58         | 0.56         | 0.40             | -0.09            |
| tZR               | -0.09  | <b>-0.77</b> | -0.03 | 0.00         | 0.07         | 0.32         | 0.63  | 0.02        | -0.30       | -0.04       | -0.27        | 0.25    | 0.42         | -0.44        | 0.40         | 0.07         | -0.27            | 0.38             |
| tZ9G              | 0.44   | 0.42         | 0.45  | 0.34         | 0.61         | 0.05         | -0.11 | 0.04        | 0.57        | 0.62        | -0.03        | -0.22   | 0.29         | 0.44         | 0.31         | 0.46         | 0.13             | -0.10            |
| tZ9GOG            |        | -0.25        | 0.62  | 0.17         | -0.12        | 0.20         | 0.14  | -0.13       | 0.10        | -0.04       | -0.44        | 0.43    | 0.02         | -0.11        | -0.05        | 0.07         | -0.28            | -0.13            |
| tZ7G              |        |              | 0.23  | -0.40        | 0.17         | -0.28        | 0.00  | 0.22        | 0.00        | 0.08        | 0.55         | -0.38   | -0.24        | <b>0.86</b>  | 0.17         | 0.25         | 0.10             | 0.25             |
| tZOG              |        |              |       | 0.02         | -0.12        | 0.20         | 0.57  | 0.00        | -0.25       | -0.18       | 0.35         | 0.15    | 0.20         | 0.39         | 0.10         | 0.13         | -0.28            | 0.22             |
| tZOGR             |        |              |       |              | 0.09         | 0.55         | -0.13 | 0.06        | <b>0.68</b> | 0.21        | -0.52        | -0.19   | 0.04         | -0.20        | -0.42        | -0.39        | 0.32             | -0.02            |
| cZ                |        |              |       |              |              | -0.18        | -0.12 | 0.01        | 0.63        | <b>0.94</b> | -0.14        | -0.10   | 0.38         | 0.10         | <b>0.68</b>  | 0.64         | 0.34             | -0.01            |
| cZ9G              |        |              |       |              |              |              | 0.28  | 0.38        | 0.03        | -0.23       | 0.19         | -0.20   | -0.04        | 0.14         | -0.27        | 0.08         | -0.45            | -0.02            |
| DZR               |        |              |       |              |              |              |       | -0.22       | -0.53       | -0.19       | 0.03         | 0.18    | 0.13         | 0.07         | 0.44         | -0.02        | -0.22            | <b>0.80</b>      |
| DZOG              |        |              |       |              |              |              |       |             | -0.08       | -0.14       | 0.68         | -0.19   | 0.09         | 0.34         | -0.08        | 0.20         | -0.43            | -0.34            |
| DZOGR             |        |              |       |              |              |              |       |             |             | <b>0.70</b> | -0.44        | 0.02    | -0.16        | 0.08         | 0.12         | 0.13         | 0.43             | -0.20            |
| iP                |        |              |       |              |              |              |       |             |             |             | -0.27        | 0.08    | 0.29         | -0.09        | 0.46         | 0.39         | 0.51             | 0.05             |
| iP7G              |        |              |       |              |              |              |       |             |             |             |              | -0.30   | 0.22         | 0.69         | -0.08        | 0.33         | -0.38            | -0.16            |
| o,m,pTs           |        |              |       |              |              |              |       |             |             |             |              |         | -0.13        | -0.59        | -0.08        | -0.30        | 0.12             | 0.28             |
| BA                |        |              |       |              |              |              |       |             |             |             |              |         |              | -0.04        | <b>0.68</b>  | 0.66         | -0.31            | -0.37            |
| IAA               |        |              |       |              |              |              |       |             |             |             |              |         |              |              | 0.30         | 0.41         | -0.11            | 0.04             |
| PAA               |        |              |       |              |              |              |       |             |             |             |              |         |              |              |              | <b>0.82</b>  | -0.13            | 0.25             |
| ABA               |        |              |       |              |              |              |       |             |             |             |              |         |              |              |              |              | -0.38            | -0.32            |
| SPAD first spike  |        |              |       |              |              |              |       |             |             |             |              |         |              |              |              |              |                  | 0.34             |

Gray – non-parametric analysis

Table S5. Sequences of specific primers designed for amplification of the genes.

| Gene              | Name           |      | Primer sequences          | Amplicon length |
|-------------------|----------------|------|---------------------------|-----------------|
| <i>Ref 2</i>      | Ta2291R        | NCBI | GCTTCTGCCTGTCACATACGC     | 165             |
|                   | Ta2291F        |      | GCTCTCCAACAACATTGCCAAC    |                 |
| <i>TaCKX1</i>     | TaCKX1_188R    |      | CCCAGGTACTCCTTGTACCCTAT   | 188             |
|                   | TaCKX1_188F    |      | GTCTACCCGCTCAACAAATCC     |                 |
| <i>TaCKX2.2.1</i> | TaCKX2_1_R_205 |      | TATCACATACGCCATCCATGC     | 205             |
|                   | TaCKX2_1_F_205 |      | TTGATCGCGGAGCTAATCCA      |                 |
| <i>TaCKX2.2.2</i> | TaCKX2_2_R_175 |      | ATCGTATCCTGGCCTCCTCA      | 175             |
|                   | TaCKX2_2_F_175 |      | TACCCCATGAACCGGAACAG      |                 |
| <i>TaCKX2.1</i>   | TaCKX2_3_R_144 |      | TCTCCTCGTTCTGCTCCTCC      | 144             |
|                   | TaCKX2_3_F_144 |      | TCTACCCCATGAACCGGGAC      |                 |
| <i>TaCKX5</i>     | TaCKX5_3B_4R   |      | CATACATGACACCAACGTACATCTT | 150             |
|                   | TaCKX5_3B_4F   |      | GTCCGATTTTTGAGAAGACTGATT  |                 |
| <i>TaCKX9</i>     | TaCKX10_R_167  |      | ACATAAAGCAATTTACCTGGACTTG | 167             |
|                   | TaCKX10_F_167  |      | GAGCTAAGGGCTTGTGGGA       |                 |
| <i>TaCKX11</i>    | TaCKX3_150R    |      | GAATTAGAGTTCACGGCTTGATG   | 150             |
|                   | TaCKX3_150F    |      | TTGTCAAGGGACTGTAGTAGGG    |                 |
| <i>TaNAC2-5A</i>  | TaNAC2_R       |      | GATGATGGAGCCCAAGGCGGAG    | 100             |
|                   | TaNAC2_F       |      | CTGGGTGCTCTGCCGGCTCTAC    |                 |

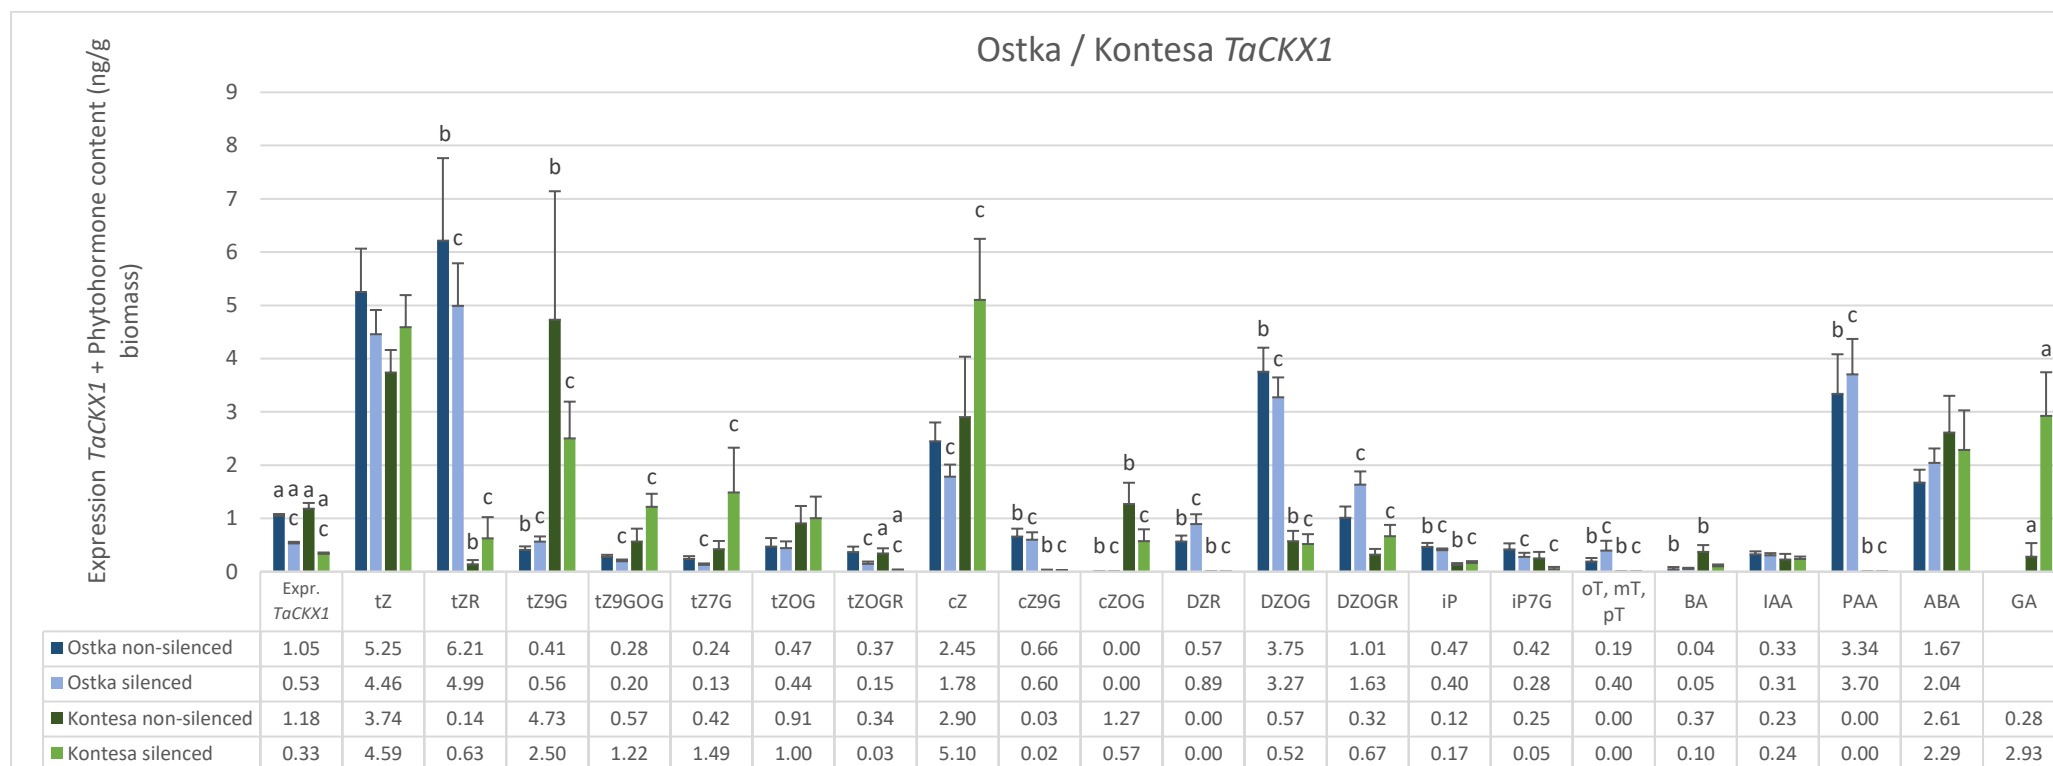

Figure S1. Comparison of composition and contents of phytohormones in 7 DAP spikes of non-silenced and silenced *TaCKX1* lines of Ostka vs. Kontesa. Not shown: (0.2 ng/g biomass): cZR, cZOGR, DZ, DZ9G, DZ7G, IPA, iPR. Not detected: IBA.

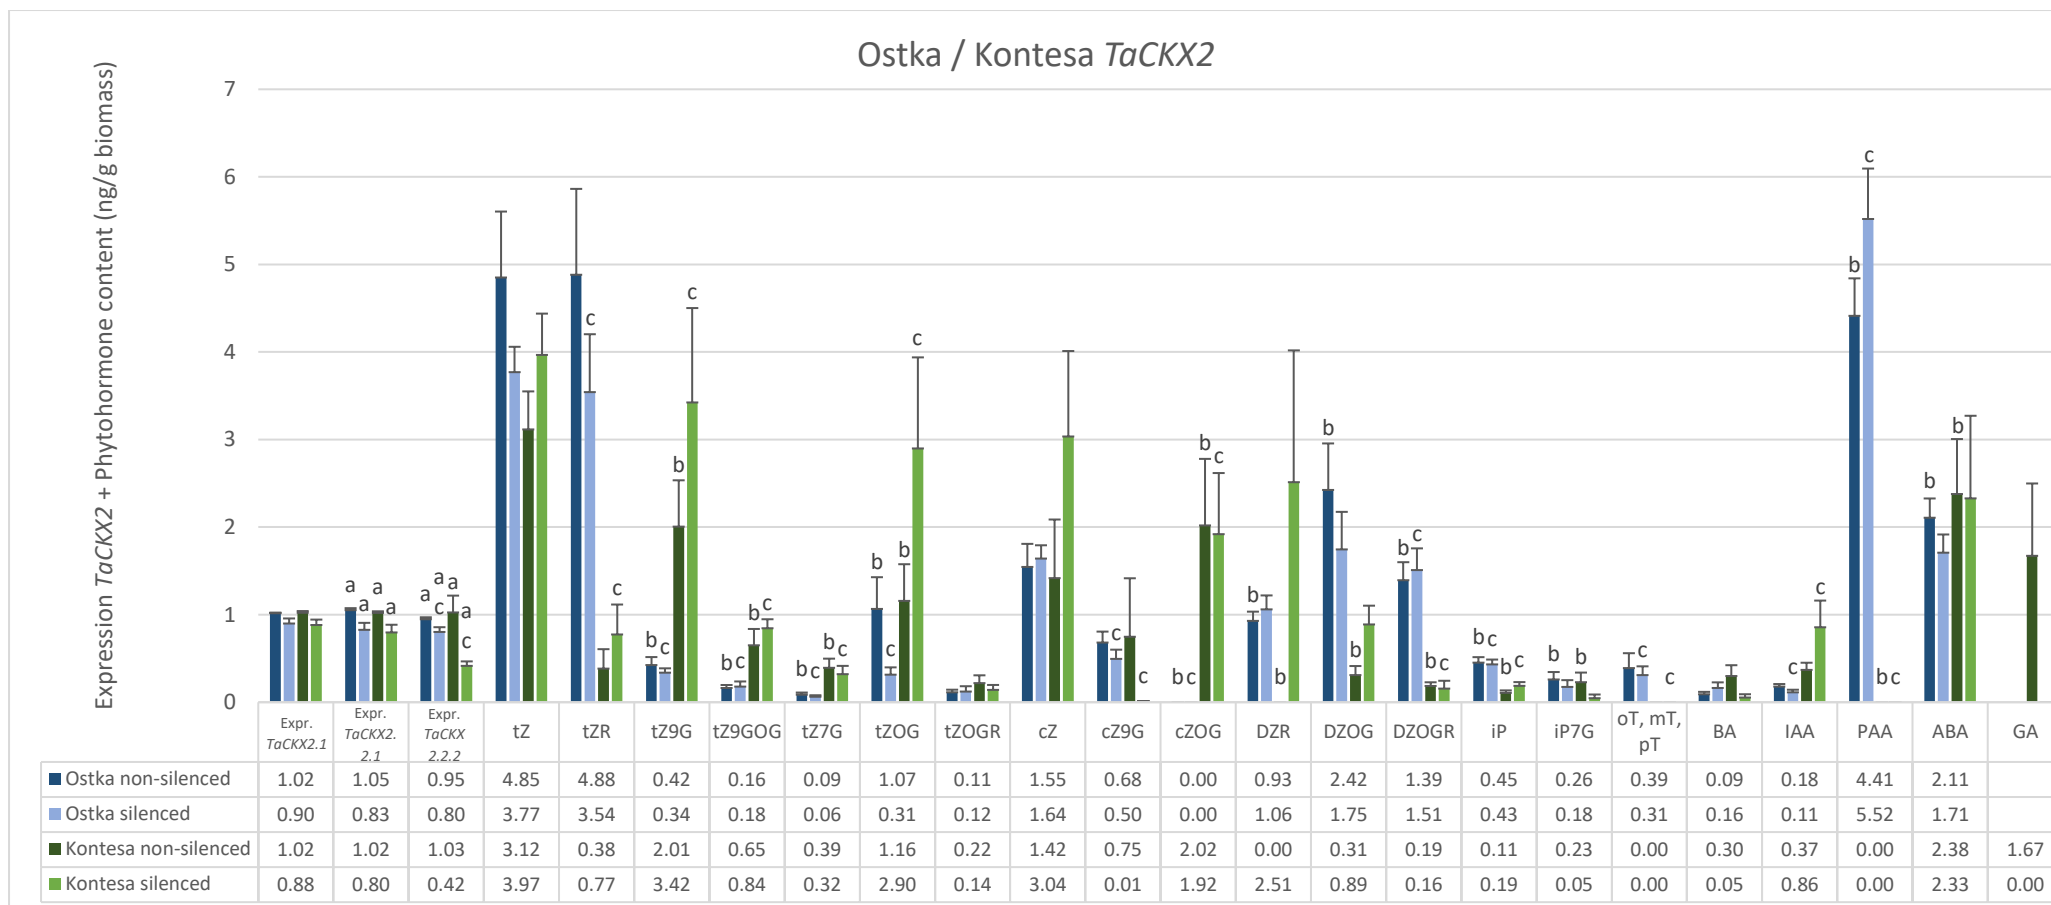

Figure S2. Comparison of composition and contents of phytohormones in 7 DAP spikes of non-silenced and silenced *TaCKX2* lines of Ostka vs. Kontesa. Not shown (<0.2 ng/g biomass): DZ9G, DZ7G, cZR, cZOGR, iPR. Not detected: DZ, IBA, IPA.
